# Supplementary material for: Comprehensive Evaluation of Dust Retention and Metal Accumulation by the Leaves of Roadside Plants in Hangzhou among Seasons
Source: MDPI journal article supplement (doi:10.3390/f13081290), 2022-08-14
Supplement: s1 [file s1]

# Comprehensive Evaluation of Dust Retention and Metal Accumulation by the Leaves of Roadside Plants in Hangzhou among Seasons

Ning Dang <sup>1,2,†</sup>, Handan Zhang <sup>1,†</sup>, Haimei Li <sup>2</sup>, Mir Md Abdus Salam <sup>3,4</sup>  
and Guangcai Chen <sup>1,\*</sup>

<sup>1</sup> Research Institute of Subtropical Forestry, Chinese Academy of Forestry, Hangzhou 311400, China

<sup>2</sup> College of Landscape Architecture and Forestry, Qingdao Agricultural University, Qingdao 266109, China

<sup>3</sup> School of Forest Sciences, University of Eastern Finland, Yliopistokatu 7, P.O. Box 111, 80100 Joensuu, Finland

<sup>4</sup> Natural Resources Institute Finland (LUKE), Yliopistokatu 6B, 80100 Joensuu, Finland

\* Correspondence: guangcaichen@sohu.com

† These authors contributed equally to this work.

**Table S1.** Biological characteristics of tree species used in the experiment.

| Species                                                | Family         | Life form | Leaf shape                                            |
|--------------------------------------------------------|----------------|-----------|-------------------------------------------------------|
| <i>Cinnamomum camphora</i> (Linn.) Presl               | Lauraceae      | Arbor     | Leaves alternate, Ovoid ellipse, Leathery             |
| <i>Loropetalum chinense</i> var. <i>Rubrum</i><br>Yieh | Hamamelidaceae | Shrub     | Ovate; Leathery                                       |
| <i>Osmanthus fragrans</i> (Thunb.) Loureiro            | Oleaceae       | Arbor     | Elliptic, oblong or elliptically lanceolate; Leathery |
| <i>Photinia × fraseri</i> Dress                        | Rosaceae       | Shrub     | Long elliptic or obovate-elliptic; Leathery           |
| <i>Pittosporum tobira</i> (Thunb.) Ait                 | Pittosporaceae | Shrub     | Obovate; Leathery                                     |

**Table S2.** Meteorological parameters of the sampling point.

| Sampling time | AQI          | Temperature (°C) | Wind speed (m/s) | PM <sub>10</sub> (μg/cm <sub>3</sub> ) | PM <sub>2.5</sub> (μg/cm <sub>3</sub> ) |
|---------------|--------------|------------------|------------------|----------------------------------------|-----------------------------------------|
| May           | 47.41 ±10.25 | 14 - 31          | 0.3 - 5.4        | 47.62 ±5.05                            | 19.86 ±4.45                             |
| August        | 46.5 ±15.19  | 26 - 39          | 0.3 - 3.3        | 42.74 ±4.04                            | 21.64 ±2.74                             |
| October       | 39.61 ±9.46  | 13 - 27          | 0.3 - 3.3        | 38.47 ±7.28                            | 18.49 ±6.99                             |
| January       | 59.54 ±13.39 | -28              | 0.3 - 3.3        | 66.74 ±12.93                           | 25.14 ±9.92                             |

**Table S3.** The grades of geo-accumulation indexes.

| Igeo     | Value Igeo | Class designation of sediment quality     |
|----------|------------|-------------------------------------------|
| $\leq 0$ | 0          | Uncontaminated                            |
| 0 ~ 1    | 1          | Uncontaminated to moderately contaminated |
| 1 ~ 2    | 2          | Moderately contaminated                   |
| 2 ~ 3    | 3          | Moderately to strongly contaminated       |
| 3 ~ 4    | 4          | Strongly contaminated                     |
| 4 ~ 5    | 5          | Strongly to extremely contaminated        |
| $> 5$    | 6          | Extremely contaminated                    |

**Table S4.** Morphological characteristics and chemical composition of residual single particles in blades.

| Number | Particle classification | Physical characteristics                            | Elementary composition                                                              |
|--------|-------------------------|-----------------------------------------------------|-------------------------------------------------------------------------------------|
| A      | Minerals particles      | Irregular sheet, layered, smooth surface            | Mainly contains O, C, Si, Al and other elements                                     |
| B      | Minerals particles      | Irregular blocky, angular, smooth surface           | Mainly contains O, Si, C, Ca, S, Mg and other elements                              |
| C      | Biological particles    | Oval                                                | Mainly contains C, N and O                                                          |
| D      | Minerals particles      | Column, smooth surface, surface with tiny particles | Mainly contains C, O, Si, Al, Fe, Zn and other elements                             |
| E      | Soot aggregates         | Fluffy polymer                                      | Mainly contains O, C, and small amount of Al, Si, Na, Mg, Fe, Ca and other elements |
| F      | Fly ash particles       | Spherical shape, smooth surface                     | Mainly contains C, O, Al, Si, and other elements                                    |

**Table S5.** Geo-accumulation index and pollution type of different heavy metals.

| Season | Geo-accumulation index |      |      |      |
|--------|------------------------|------|------|------|
|        | Cd                     | Ni   | Pb   | Cu   |
| Spring | 3.99                   | 0.83 | 1.99 | 3.78 |
| Series | 4                      | 1    | 2    | 4    |
| Summer | 5.04                   | 1.37 | 2.10 | 4.31 |
| Series | 6                      | 2    | 3    | 5    |
| Autumn | 4.19                   | 1.10 | 2.34 | 4.18 |
| Series | 5                      | 2    | 3    | 5    |
| Winter | 4.44                   | 1.13 | 2.42 | 4.88 |
| Series | 5                      | 2    | 3    | 5    |
