# Supplementary material for: Comprehensive Evaluation of Dust Retention and Metal Accumulation by the Leaves of Roadside Plants in Hangzhou among Seasons
Source: MDPI journal article supplement (doi:10.3390/f13081290), 2022-08-14
Supplement: s1 [file s1]

Archive with 1 entries (1 files):
- forests-1833890-supplementary.pdf
